# Supplementary material
Source: publisher site journal article supplement (https://www.dovepress.com/article/457338)
Supplement: Supplementary file 1 [file get_supplementary_file.php]

**Supplementary material**

***Parabacteroides distasonis*-Derived Outer Membrane Vesicles Enhance Antitumor Immunity Against Colon Tumors by Modulating CXCL10 and CD8+ T Cells**

Rongyao Liang1*

Pei Li1, 2*

Na Yang1

Xiaoyi Xiao1

Jing Gong1

Xingyuan Zhang1

Yunuan Bai1

Yanlong Chen1

Zhiyong Xie3

Qiongfeng Liao1

*These authors contributed equally to this work

# Supplementary Method

## *Proteomics Method*

### Protein Extraction

Add lysis buffer (8 M urea including 1 mM PMSF, 2 mM EDTA) into sample and conduct ultrasound to break the cells. Remaining debris was removed by centrifugation at 15000 *g* at 4°C for 10 min. Total protein concentration was measured by BCA protein quantitation assay.

### Digestion and Cleanup

Equal amount of proteins from each sample were used for tryptic digestion. Add 8 M urea to 200 μl to the supernatants, then reduced with 10 mM DTT for 45 min at 37°C and alkylated with 50 mM iodoacetamide (IAM) for 15 min in a dark room at room temperature. 4 × volume of chilled acetone was added and precipitated at -20°C for 2 h. After centrifugation, the protein precipitate was air-dried and resuspended in 200 μl of 25 mM ammonium bicarbonate solution and 3 μl of trypsin (Promega) and digested overnight at 37°C. After digestion, peptides were desalted using C18 Cartridge followed by drying with Vacuum concentration meter, concentrated by vacuum centrifugation and redissolved in 0.1% (v/v) formic acid.

### LC-MS/MS Analysis

Liquid chromatography (LC) was performed on a nanoElute UHPLC (Bruker Daltonics, Germany). About 200 ng peptides were separated within 40 min at a flow rate of 0.3 μl/min on a commercially available reverse-phase C18 column with an integrated CaptiveSpray Emitter (25 cm x 75 μm ID, 1.6 μm, Aurora Series with CSI, IonOpticks, Australia).The separation temperature was kept by an integrated Toaster column oven at 50 °C. Mobile phases A and B were produced with 0.1 vol.-% formic acid in water and 0.1% formic acid in ACN. Mobile phase B was increased from 2 to 22% over the first 25 min, increased to 35% over the next 5 min, further increased to 80% over the next 5 min, and then held at 80% for 5 min. The LC was coupled online to a hybrid timsTOF Pro2 (Bruker Daltonics, Germany) via a CaptiveSpray nano-electrospray ion source (CSI). To establish the applicable acquisition windws for diaPASEF mode, the timsTOF Pro2 was operated in Data-Dependent Parallel Accumulation-Serial Fragmentation (PASEF) mode with 4 PASEF MS/MS frames in 1 complete frame. The capillary voltage was set to 1500 V, and the MS and MS/MS spectra were acquired from 100 to 1700 m/z. As for ion mobility range (1/K0), 0.85 to 1.3 Vs/cm2 was used. The “target value” of 10,000 was applied to a repeated schedule, and the intensity threshold was set at 1500. The collision energy was ramped linearly as a function of mobility from 45eV at 1/K0 = 1.3 Vs/cm2 to 27 eV at 1/K0 = 0.85 Vs/cm2. The quadrupole isolation width was set to 2 Th for m/z < 700 and 3 Th for m/z > 800.

In diaPASEF mode, the instrument control software was extended to define quadrupole isolation windows as a function of the TIMS scan time. Seamless and synchronous ramping of all applied voltage is achieved by modifying the instrument control electronics. We defined 25 Th isolation windows from m/z about 400 to 1200 and totally 48 windows were defined. Other parameters were the same as DDA-PASEF mode.

### Database search and quantification

MS raw data were analyzed using DIA-NN (v1.8.1) with library-free method. the uniprotkb_proteome_UP000000566_2024_02_19.fasta database (A total of 3830 sequences) was uesed to creat a spectra library with deep learning algrithms of neural networks. the option of MBR was employed to create a spectral library from DIA data and then reanlyse using this library. FDR of search results was adjusted to < 1% at both protein and precursor ion levels, the remaining identifications were used for further quantification analysis.

## *Transcriptomics Method*

### *Sample collection and preparation*

#### 1.RNA quantification and qualification

RNA degradation and contamination was monitored on 1% agarose gels. RNA purity was checked using the NanoPhotometer® spectrophotometer (IMPLEN, CA, USA). RNA concentration was measured using Qubit® RNA Assay Kit in Qubit®2.0 Flurometer (Life Technologies, CA, USA). RNA integrity was assessed using the RNA Nano 6000 Assay Kit of the Bioanalyzer 2100 system (Agilent Technologies, CA, USA).

#### 2.Library preparation for Transcriptome sequencing

A total amount of 1 μg RNA per sample was used as input material for the RNA sample preparations. Sequencing libraries were generated using NEBNext®UltraTM RNA Library Prep Kit for Illumina® (NEB, USA) following manufacturer’s recommendations and index codes were added to attribute sequences to each sample. Briefly, mRNA was purified from total RNA using poly-T oligo attached magnetic beads. Fragmentation was carried out using divalent cations under elevated temperature in NEBNext First Strand Synthesis ReactionBuffer (5X). First strand cDNA was synthesized using random hexamer primer and M-MuLV Reverse Transcriptase (RNase H-). Second strand cDNA synthesis was subsequently performed using DNA Polymerase I and RNase H. Remaining overhangs were converted into blunt ends via exonuclease/polymerase activities. After adenylation of 3’ ends of DNA fragments, NEBNext Adaptor with hairpin loop structure were ligated to prepare for hybridization. In order to select cDNA fragments of preferentially 250~300 bp in length, the library ragments were purified with AMPure XP system (Beckman Coulter, Beverly, USA). Then 3 μl USER Enzyme (NEB, USA) was used with size-selected, adaptor-ligated cDNA at 37°C for 15 min followed by 5 min at 95 °C before PCR. Then PCR was performed with Phusion High-Fidelity DNA polymerase, Universal PCR primers and Index(X) Primer. At last, PCR products were purified (AMPure XP system) and library quality was assessed on the Agilent Bioanalyzer 2100 system.

#### 3.Clustering and sequencing

The clustering of the index-coded samples was performed on a cBot Cluster Generation System using TruSeq PE Cluster Kit v3-cBot-HS (Illumia) according to the manufacturer’s instructions. After cluster generation, the library preparations were sequenced on an Illumina platform and 150 bp paired-end reads were generated.

### *Data Analysis*

#### 1.Data quality control

Use fastp v 0.19.3 to filter the original data, mainly to remove reads with adapters; when the N content in any sequencing reads exceeds 10% of the base number of the reads, remove the paired reads; when any sequencing reads When the number of low-quality (Q<=20) bases contained in reads exceeds 50% of the bases of the reads, these paired reads will be removed. All subsequent analyses are based on clean reads.

#### 2. Reads mapping to the reference genome

Download the reference genome and its annotation files from the designated website, use HISATv2.1.0 to construct the index, and compare clean reads to the reference genome.

#### 3. New transcript prediction

Use StringTie v1.3.4d for new gene prediction. StringTie applies network streaming algorithms and optional de novo to splice transcripts. Compared with Cufflinks and other software, StringTie can splice a more complete and accurate transcript, and the splicing speed is faster.

#### 4. Quantification of gene expression levels

Use featureCounts v1.6.2 /StringTie v1.3.4d to calculate the gene alignment and FPKM. FPKM is currently the most commonly used method to estimate gene expression levels.

#### 5. Difference analysis

DESeq2 v1.22.1 /edgeR v3.24.3 was used to analyze the differential expression between the two groups, and the P value was corrected using the Benjamini & Hochberg method. The corrected P value and |log2foldchange| are used as the threshold for significant difference expression.

#### 6. Differential gene enrichment analysis

The enrichment analysis is performed based on the hypergeometric test. For KEGG, the hypergeometric distribution test is performed with the unit of pathway; for GO, it is performed based on the GO term.

#### 7. Differential AS analysis

Use rMATS v3.1.0 to analyze variable splicing events, including five alternative splicing events: SE, RI, MXE, A5SS, and A3SS.

#### 8. SNP analysis

Use GATK v4.1.9.0 to analyze the variant sites, and use annovar to annotate the variant sites.

#### 9. Differential gene protein interaction analysis

The protein interaction analysis of differentially expressed genes is based on the STRING database of known and predicted protein-protein interactions. For the species existing in the database, we construct the network by extracting the target gene list from the database; otherwise, use diamond v0.9.24.125 to compare the target gene sequence with the selected reference protein sequence, and then according to the selected reference species Know the interaction to build a network.

#### 10. GSEA

Use gsea-3.0.jar for gene set enrichment analysis.

#### 11. WGCNA

Use WGCNA v1.69 for weighted gene co-expression network analysis.

# Supplementary Table:

**Table S1** The sequences of qPCR primers

| Target genes | Primer sequence | |
| --- | --- | --- |
| Forward 5'-3' | Reverse 5'-3' |
| *IL-1β* | TTCAGGCAGGCAGTATCACTC | GAAGGTCCACGGGAAAGACAC |
| *TNF-α*  *IL-6* | GAAGGTCCACGGGAAAGACAC  CTTCTTGGGACTGATGCTGGTGAC | CCACCACGCTCTTCTGTCTAC  AGTGGTATCCTCTGTGAAGTCTCCTC |
| *CXCL10* | GCTGCAACTGCATCCATATC | AGGAGCCCTTTTAGACCTTTATGTAC |

# Supplementary Figure:


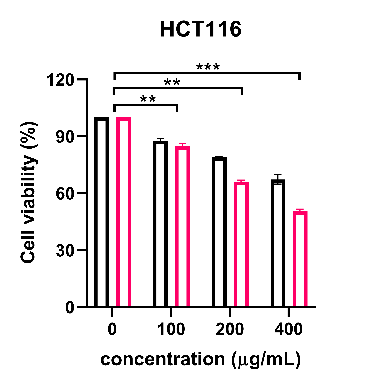

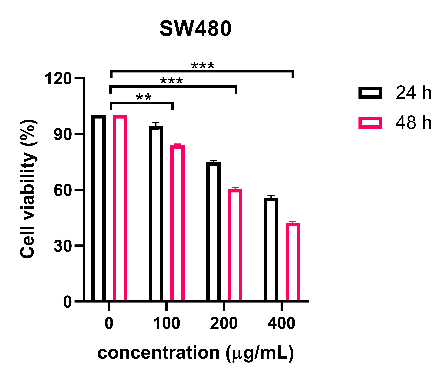


**Figure S1** Viabilities of HCT116 and SW480 cells with the treatment of *Pd*-OMVs for 24 and 48 h, respectively. Data are presented as the mean ± SEM (n = 3). ** *p* < 0.01, *** *p* < 0.001.


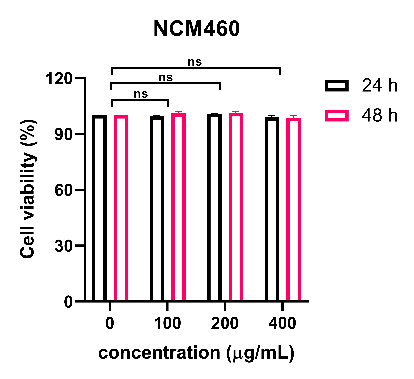


**Figure S2** Viability of NCM460 cells with the treatment of *Pd*-OMVs for 24 and 48 h, respectively. Data are presented as the mean ± SEM (n = 3). ns, no significance.


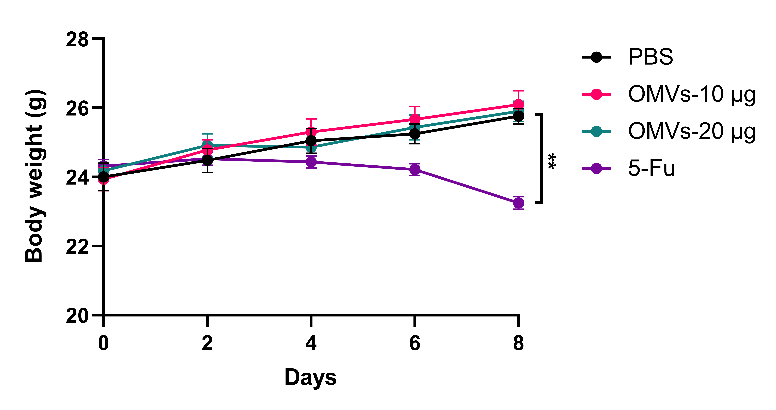


**Figure S3** Body weight changes of mice in each group. Data are presented as the mean ± SEM (n = 6). ** *p* < 0.01.


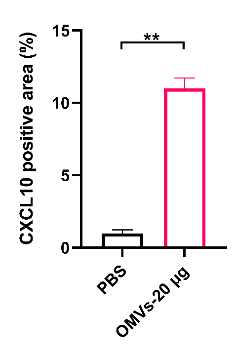

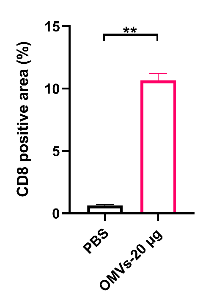


**Figure S4** Quantitative analysis of IHC images of CXCL10 and CD8. Data are presented as the mean ± SEM (n = 6). ** *p* < 0.01.


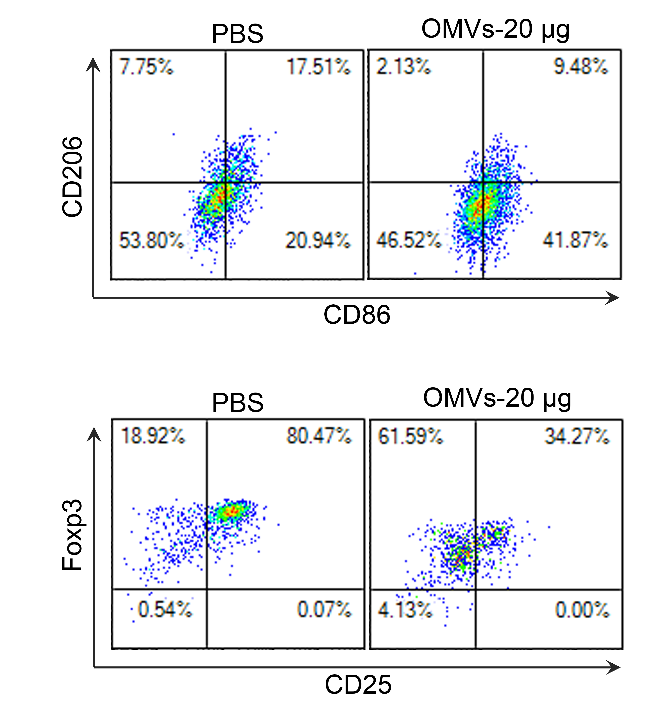

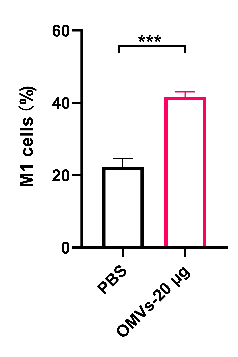

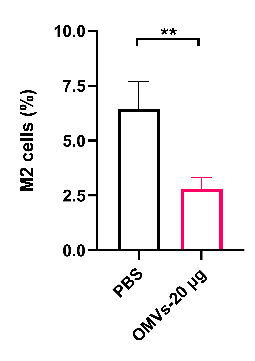


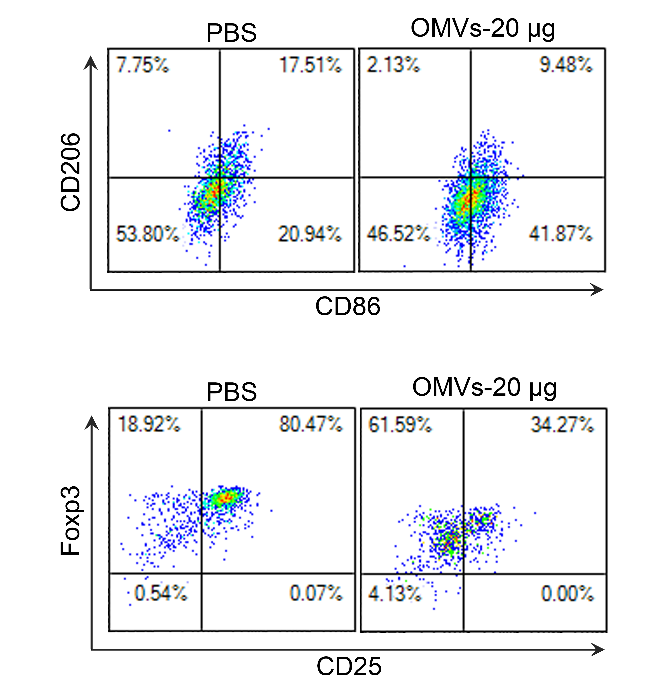

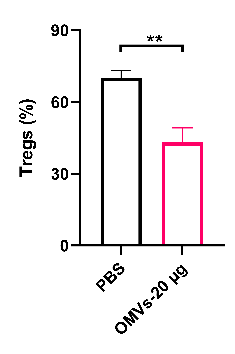


**Figure S5** Representative flow cytometry analysis images and percentage of M1, M2 and Treg cells. Data are presented as the mean ± SEM (n = 6). ** *p* < 0.01, *** *p* < 0.001.


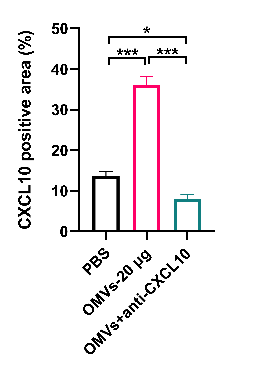

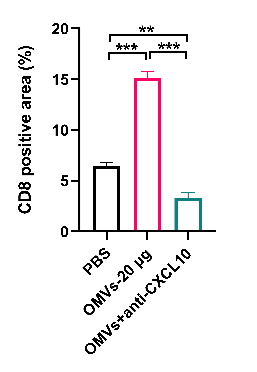


**Figure S6** Quantitative analysis of IHC images of CXCL10 and CD8. Data are presented as the mean ± SEM (n = 6). * *p* < 0.05, ** *p* < 0.01, *** *p* < 0.001.


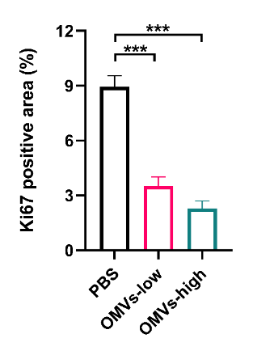

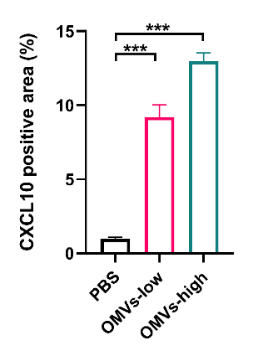

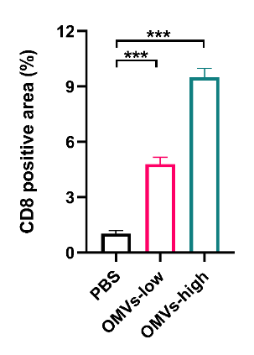


**Figure S7** Quantitative analysis of IHC images of Ki67, CXCL10 and CD8. Data are presented as the mean ± SEM (n = 6). *** *p* < 0.001.
